# Supplementary material for: The Effects of Particle LET and Fluence on the Complexity and Frequency of Clustered DNA Damage
Source: MDPI journal article supplement (doi:10.3390/dna4010002), 2024-01-05
Supplement: s1 [file s1]

## Supplemental Materials

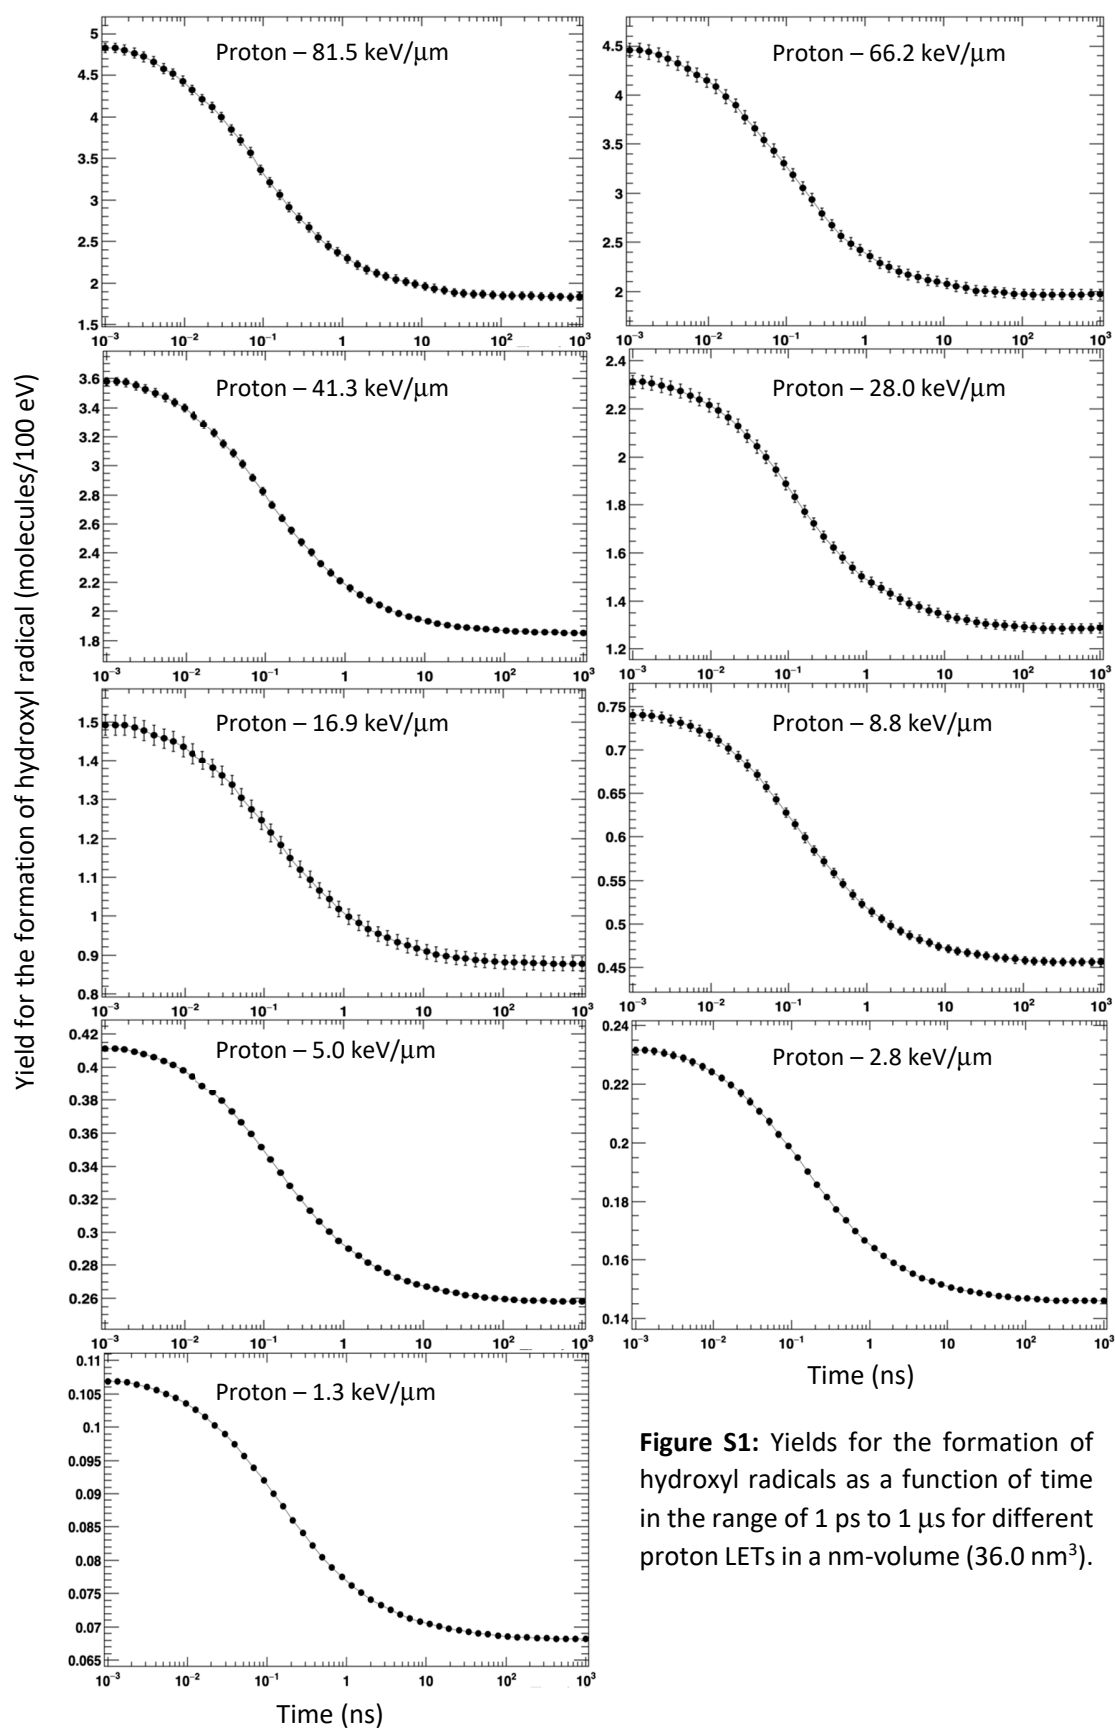

**Figure S1:** Yields for the formation of hydroxyl radicals as a function of time in the range of 1 ps to 1  $\mu$ s for different proton LETs in a nm-volume ( $36.0 \text{ nm}^3$ ).

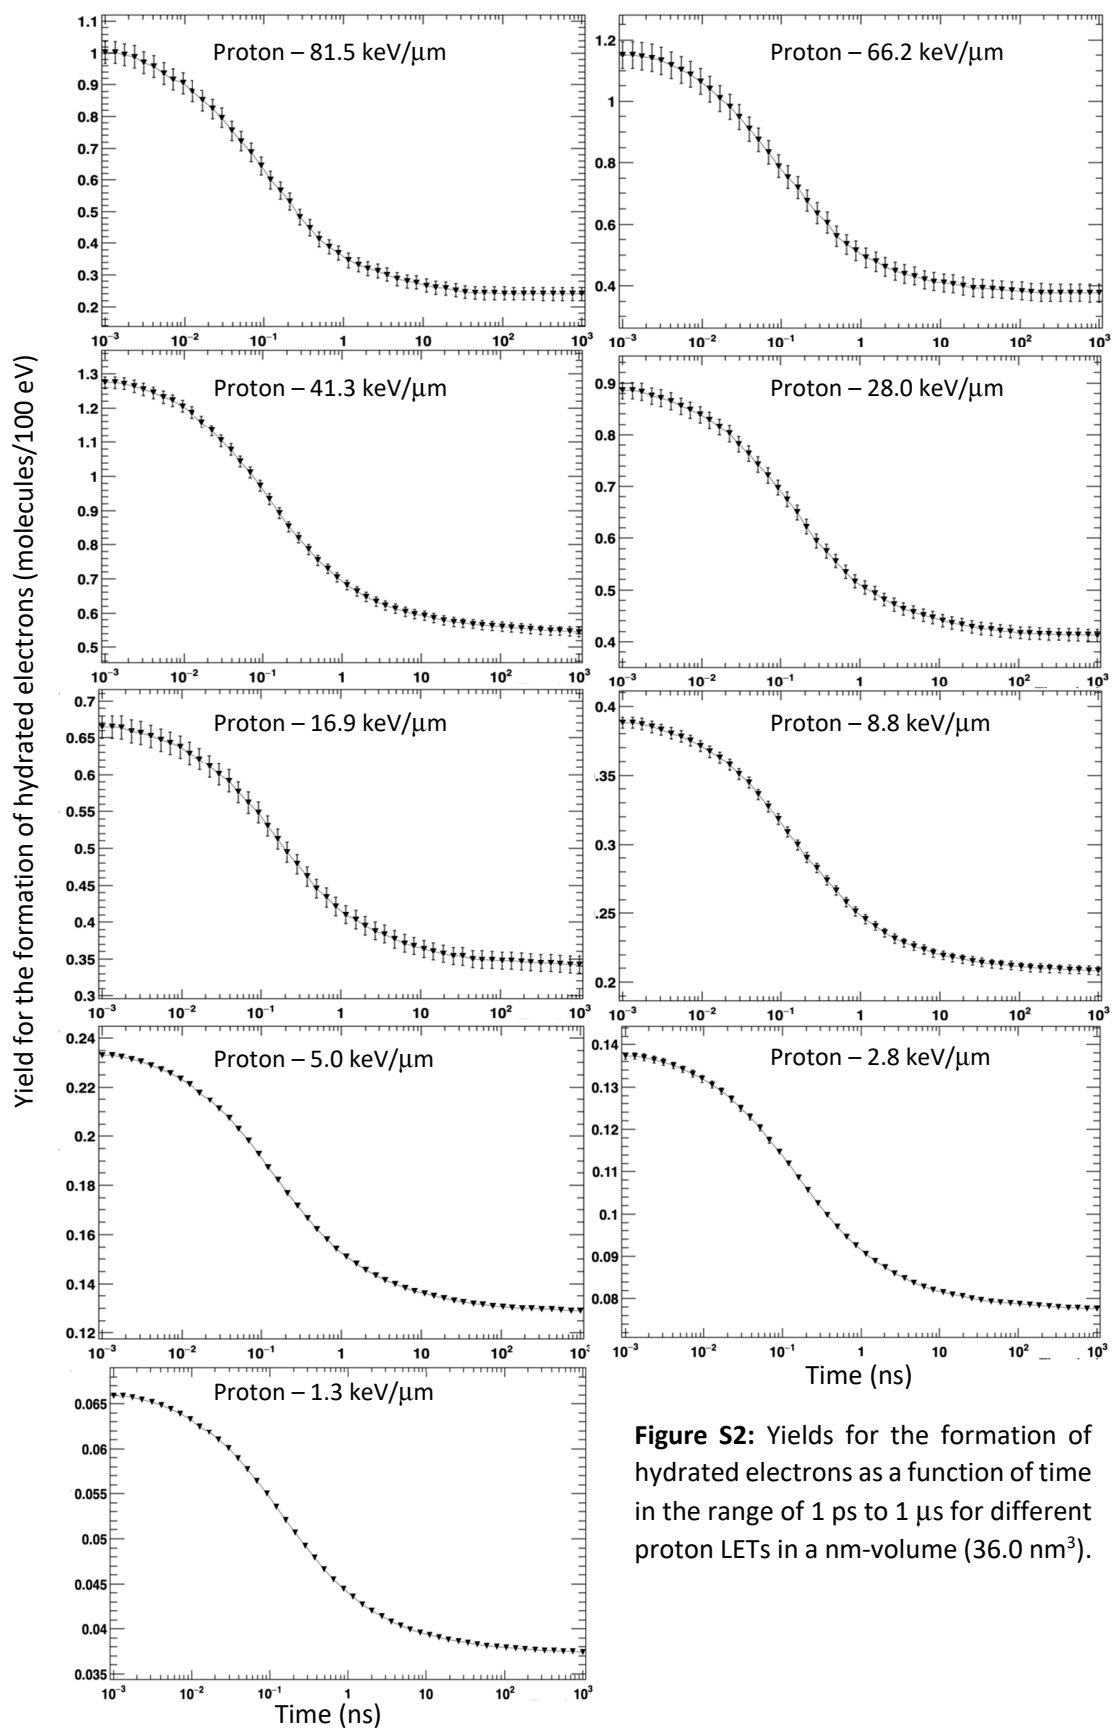

**Figure S2:** Yields for the formation of hydrated electrons as a function of time in the range of 1 ps to 1  $\mu\text{s}$  for different proton LETs in a nm-volume (36.0 nm<sup>3</sup>).

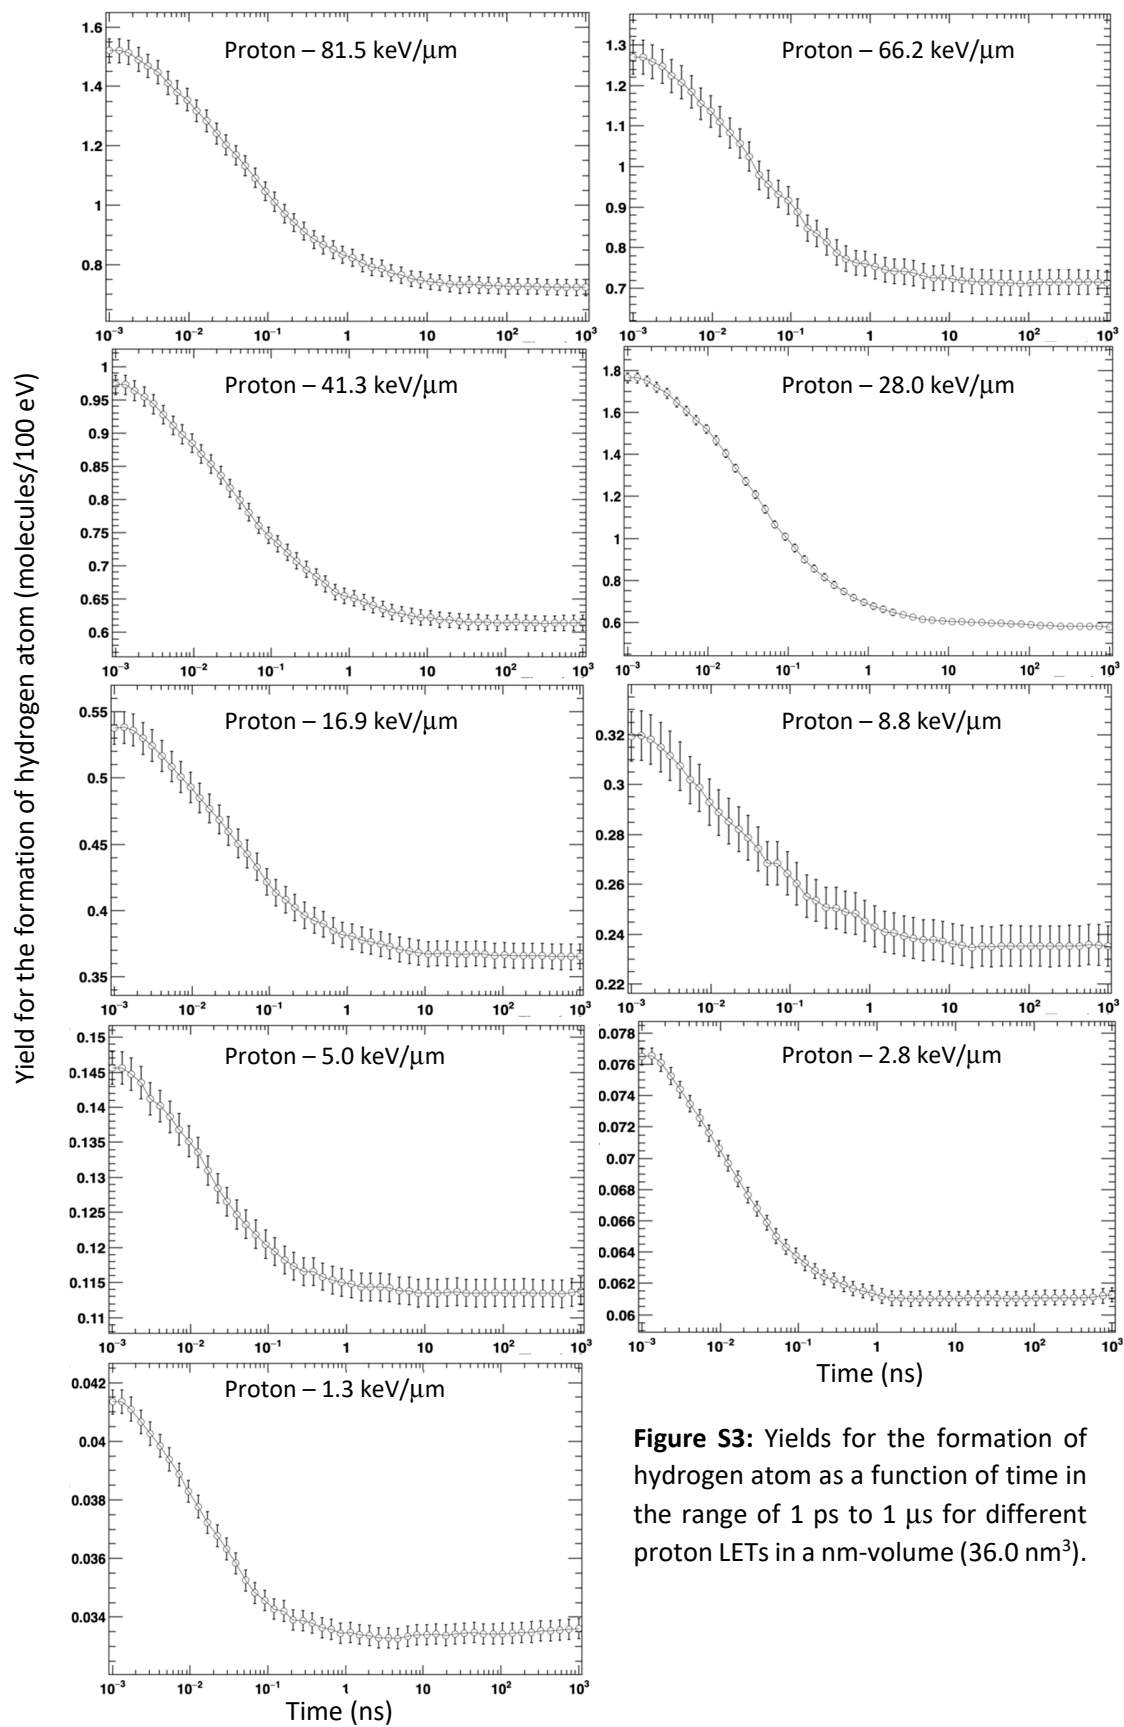

**Figure S3:** Yields for the formation of hydrogen atom as a function of time in the range of 1 ps to 1  $\mu$ s for different proton LETs in a nm-volume (36.0 nm<sup>3</sup>).

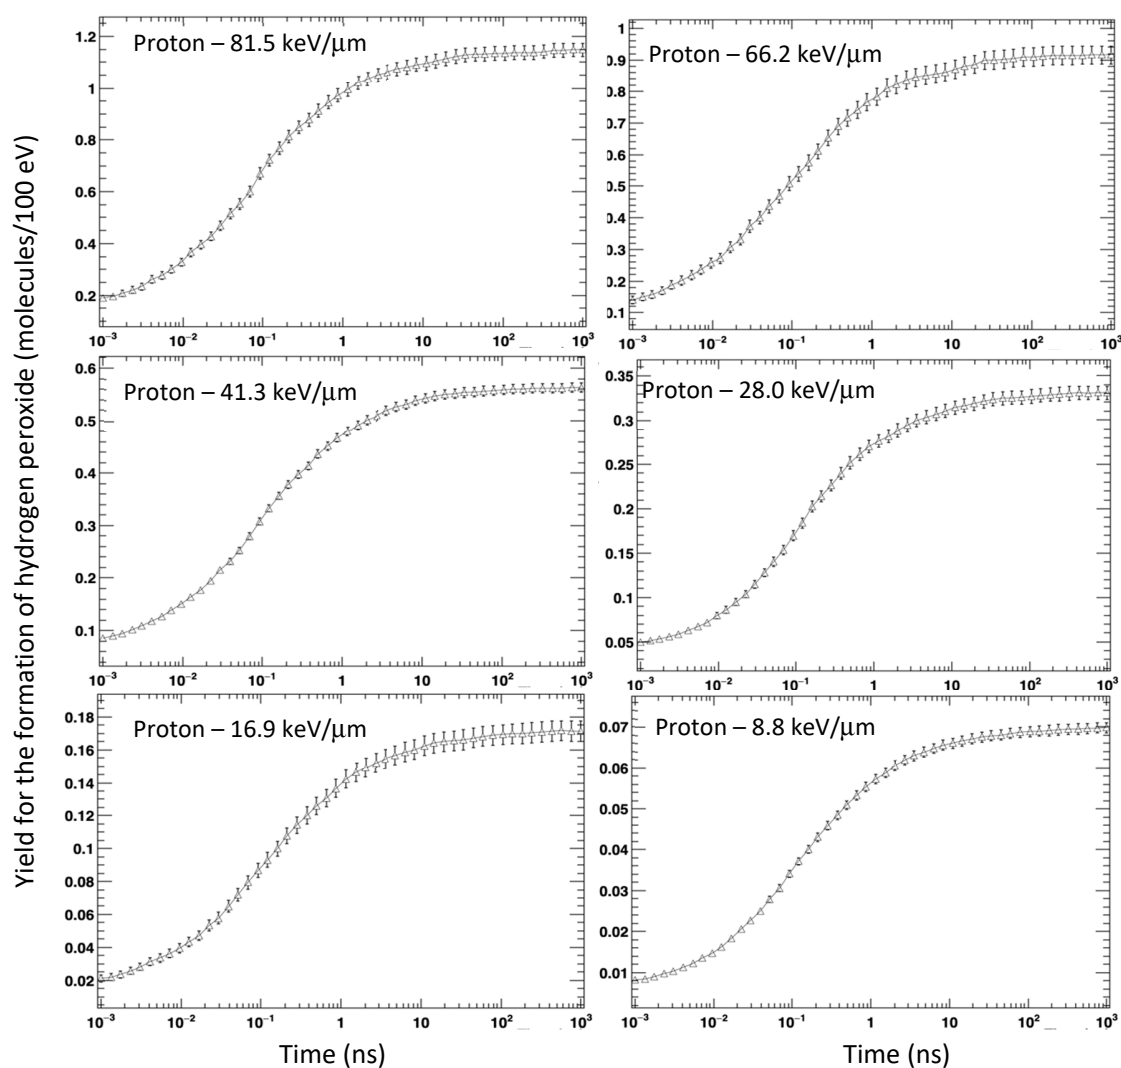

**Figure S4:** Yields for the formation of hydrogen peroxide as a function of time in the range of 1 ps to 1 μs for different proton LETs in a nm-volume (36.0 nm<sup>3</sup>).

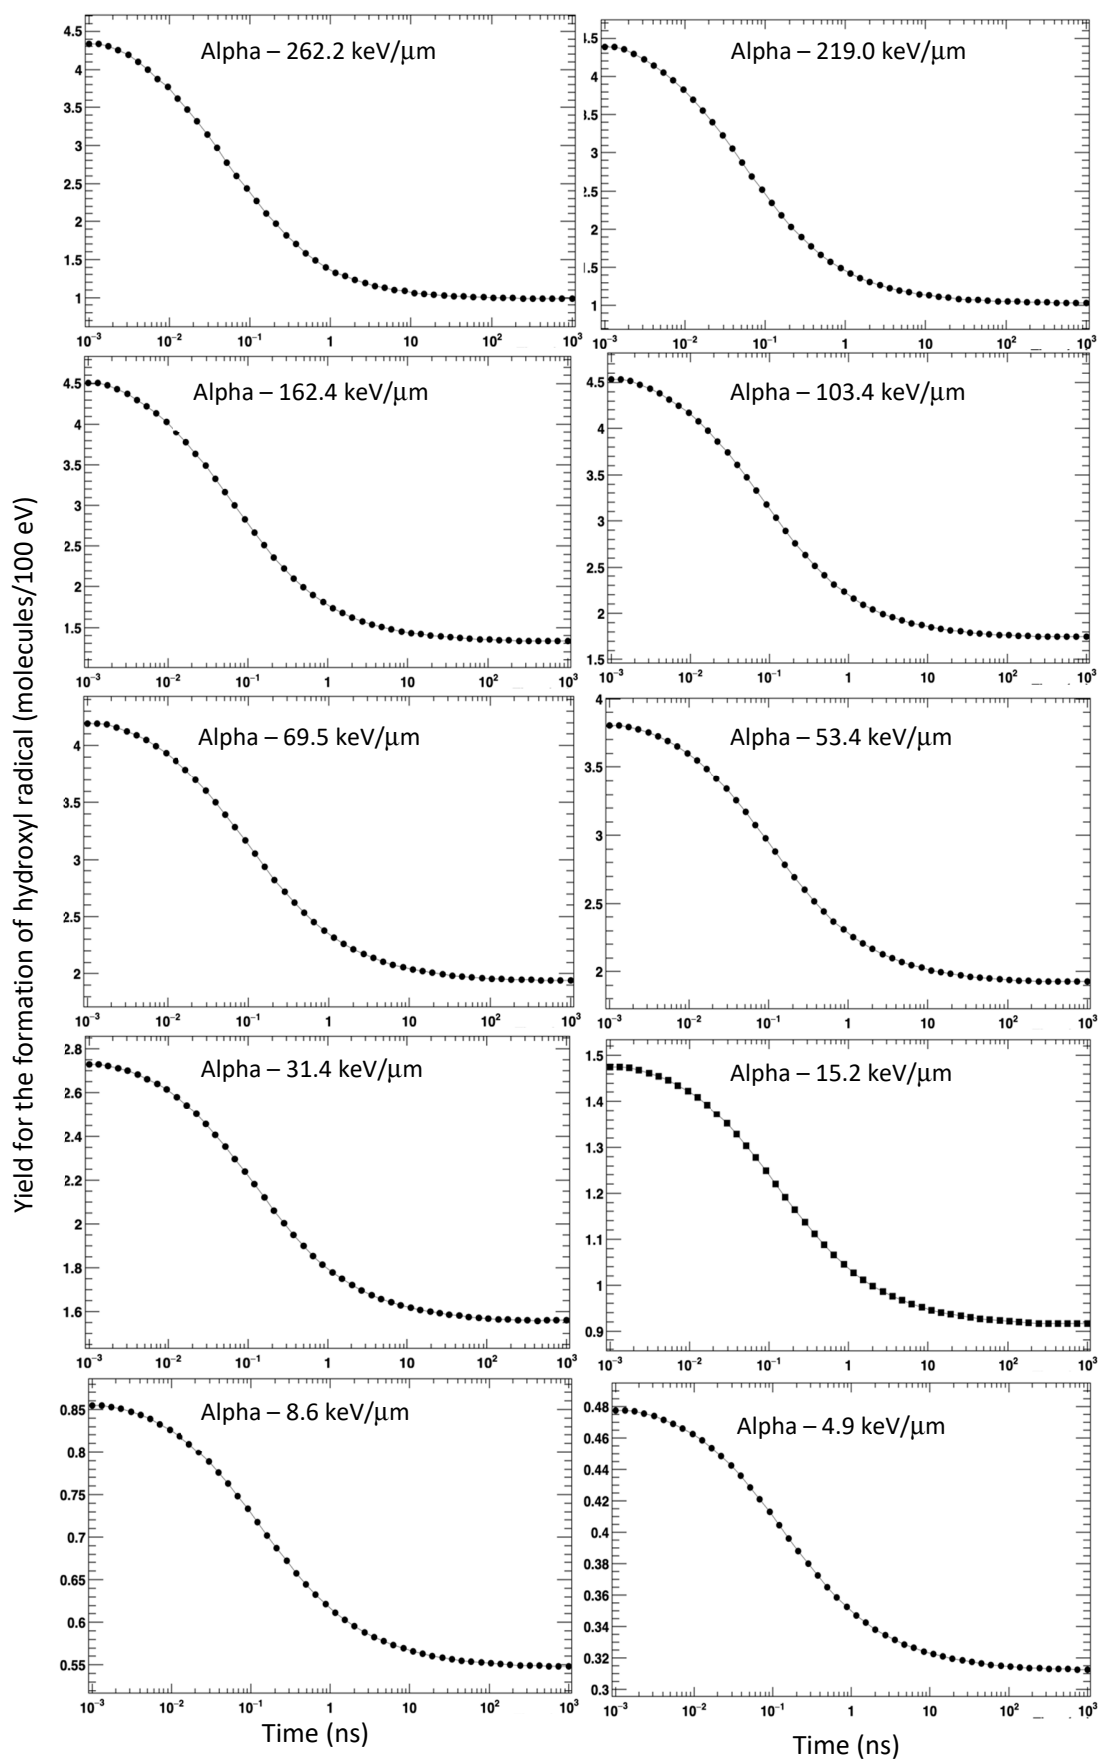

**Figure S5:** Yields for the formation of hydroxyl radicals as a function of time in the range of 1 ps to 1 μs by alpha particle at different LETs in a nm-volume (36.0 nm<sup>3</sup>).

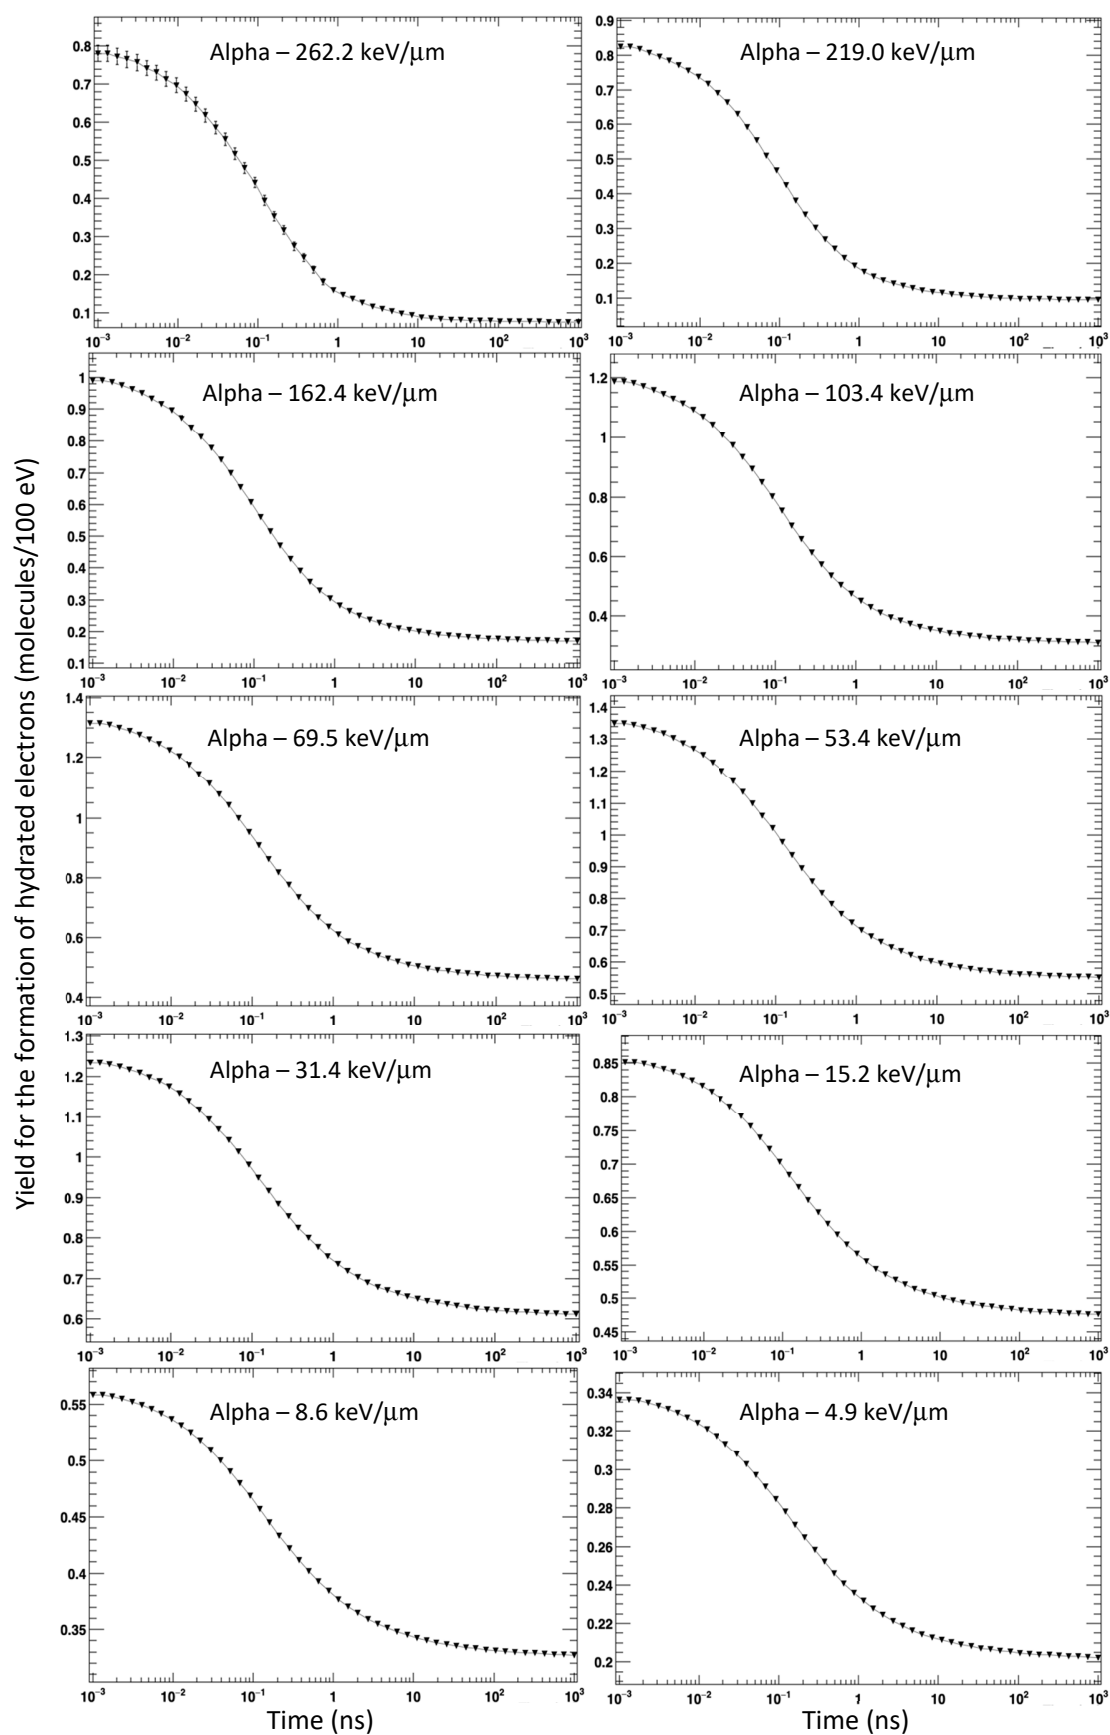

**Figure S6:** Yields for the formation of hydrated electrons as a function of time in the range of 1 ps to 1 μs by alpha particle at different LETs in a nm-volume (36.0 nm<sup>3</sup>).

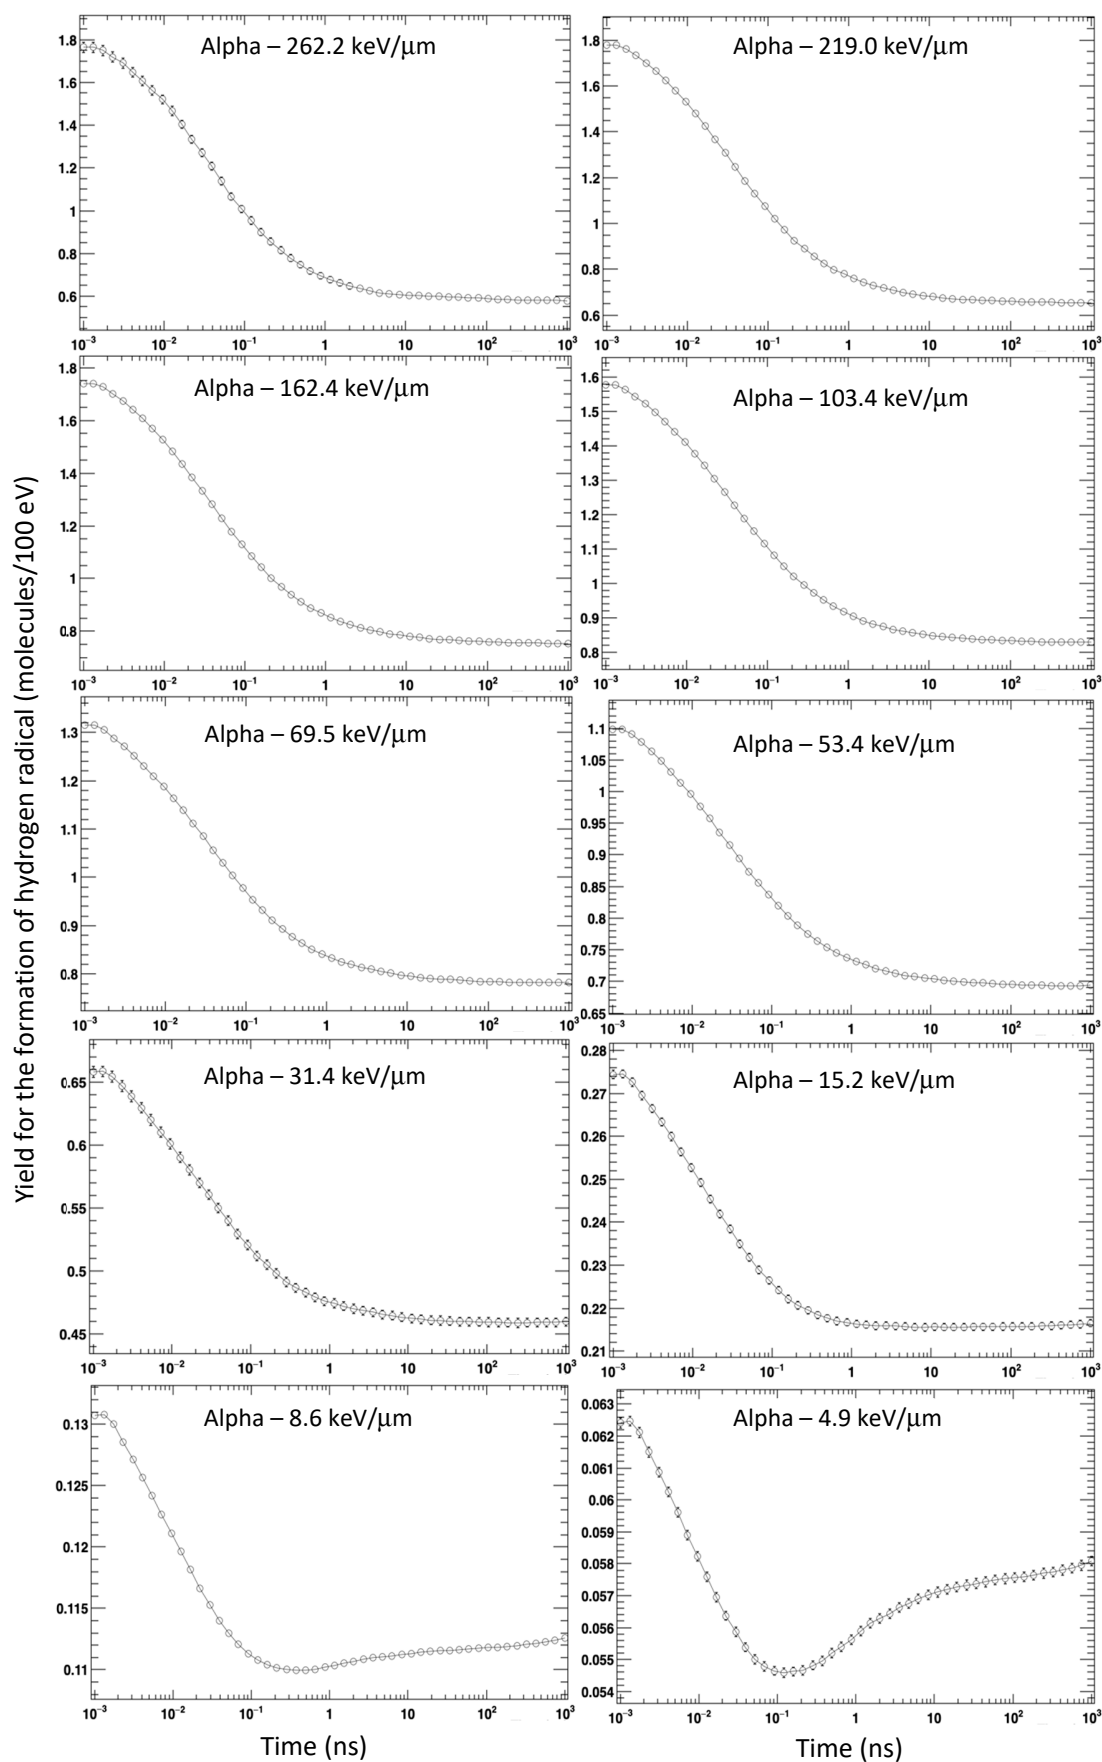

**Figure S7:** Yields for the formation of hydrogen radical as a function of time in the range of 1 ps to 1  $\mu$ s by alpha particle at different LETs in a nm-volume (36.0 nm<sup>3</sup>).

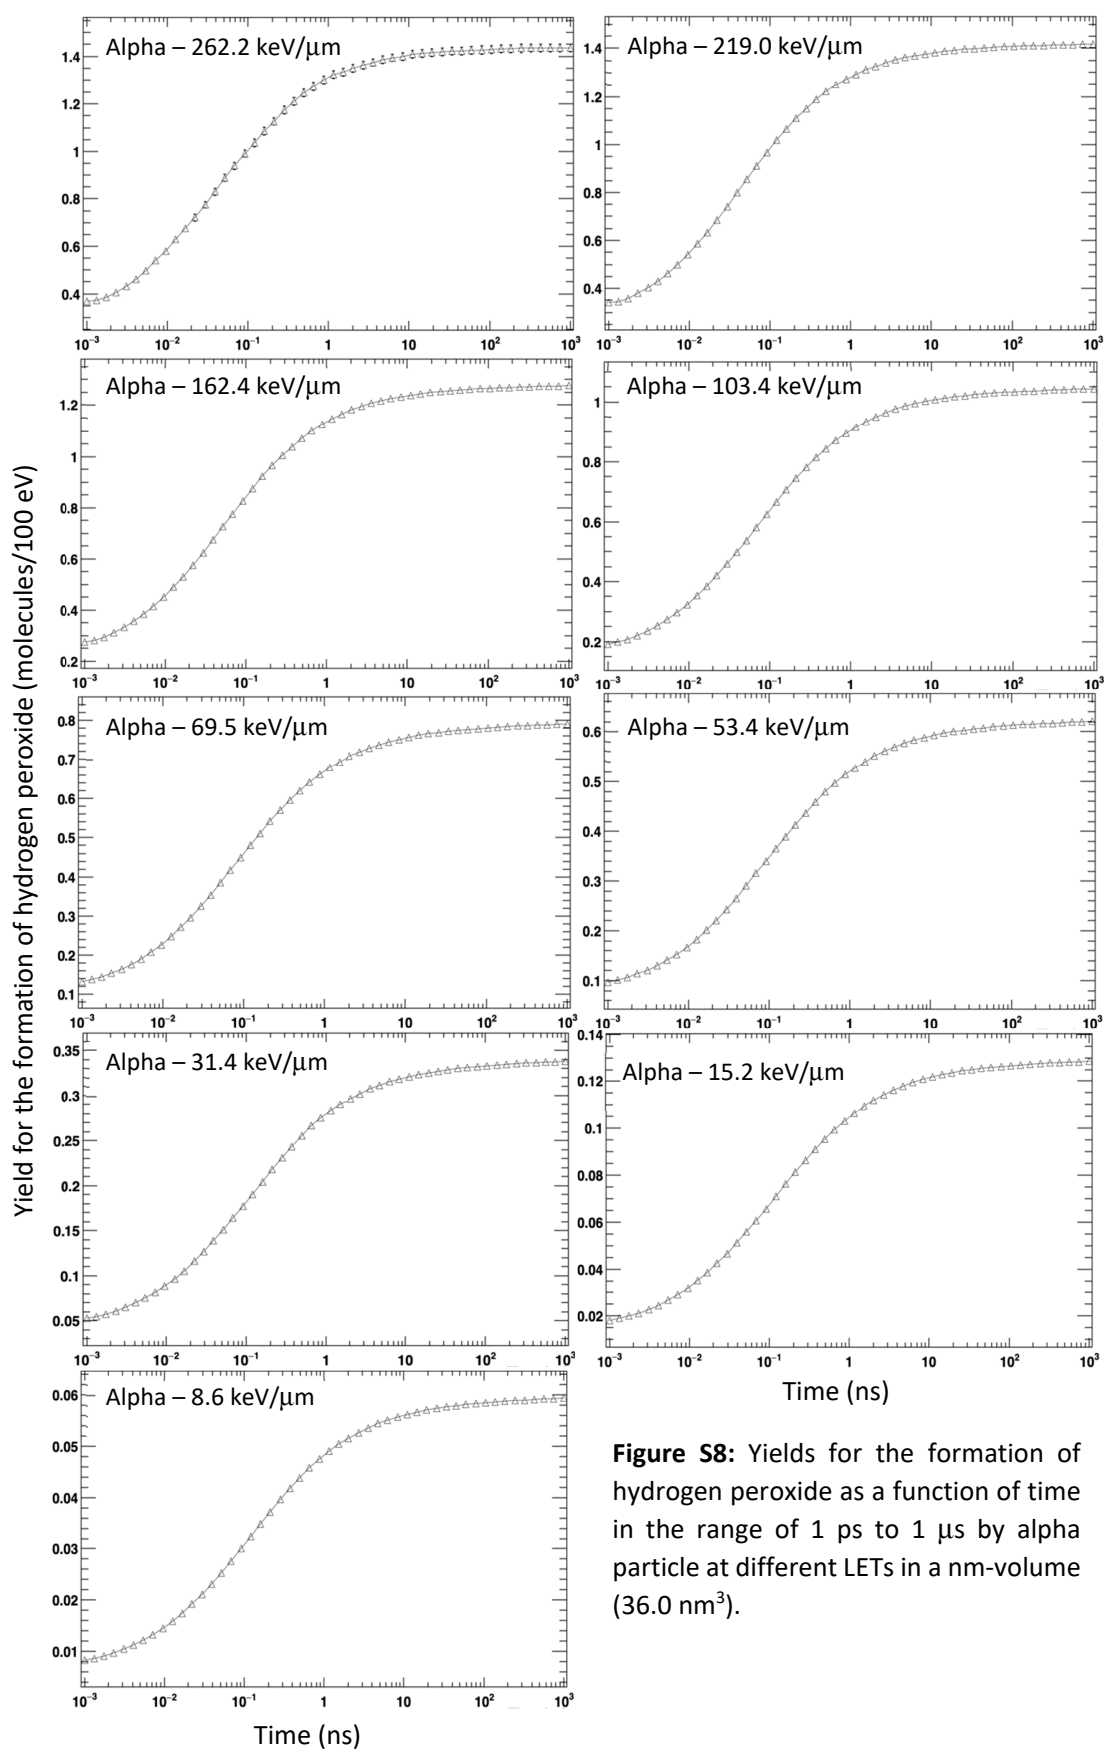

**Figure S8:** Yields for the formation of hydrogen peroxide as a function of time in the range of 1 ps to 1  $\mu$ s by alpha particle at different LETs in a nm-volume ( $36.0 \text{ nm}^3$ ).
